# Supplementary material
Source: PubMed Central journal article supplement (PMC7484955)
Supplement: NIHMS1623768-supplement-Supplementary_Figure_S1.pdf [file NIHMS1623768-supplement-Supplementary_Figure_S1.pdf]

A `cd project`  
`mkdir fastq`

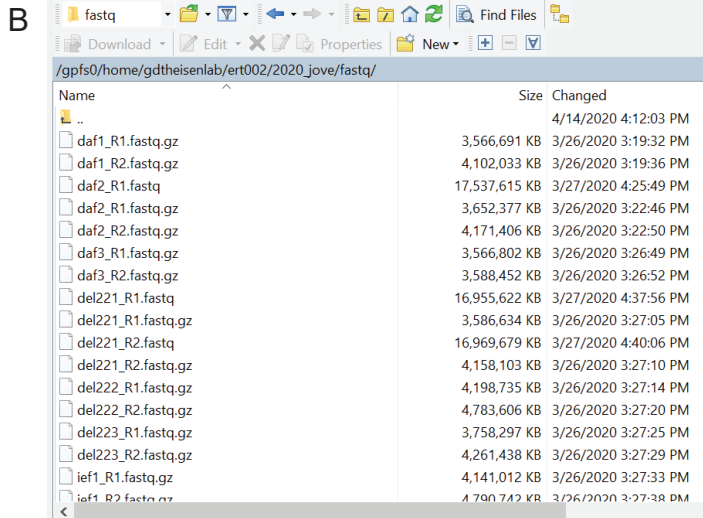

C `mkdir trimmed`  
`cd fastq`  
`trim_galore -o path_to/project/trimmed --paired sample1_R1.fastq.gz sample1_R2.fastq.gz`

D `cd ..`  
`mkdir STAR_output`  
`cd trimmed`  
`STAR --runThreadN [N] --genomeDir path_to/STAR_index --readFilesIn sample1_R1_val_1.fq.gz sample1_R2_val_2.fq.gz`  
`--readFilesCommand zcat --outFileNamePrefix path_to/project/STAR_output/sample1_ --quantMode GeneCounts`  
`--twopassMode Basic --outSAMunmapped Within`
