# Supplementary material
Source: PubMed Central journal article supplement (PMC7484955)

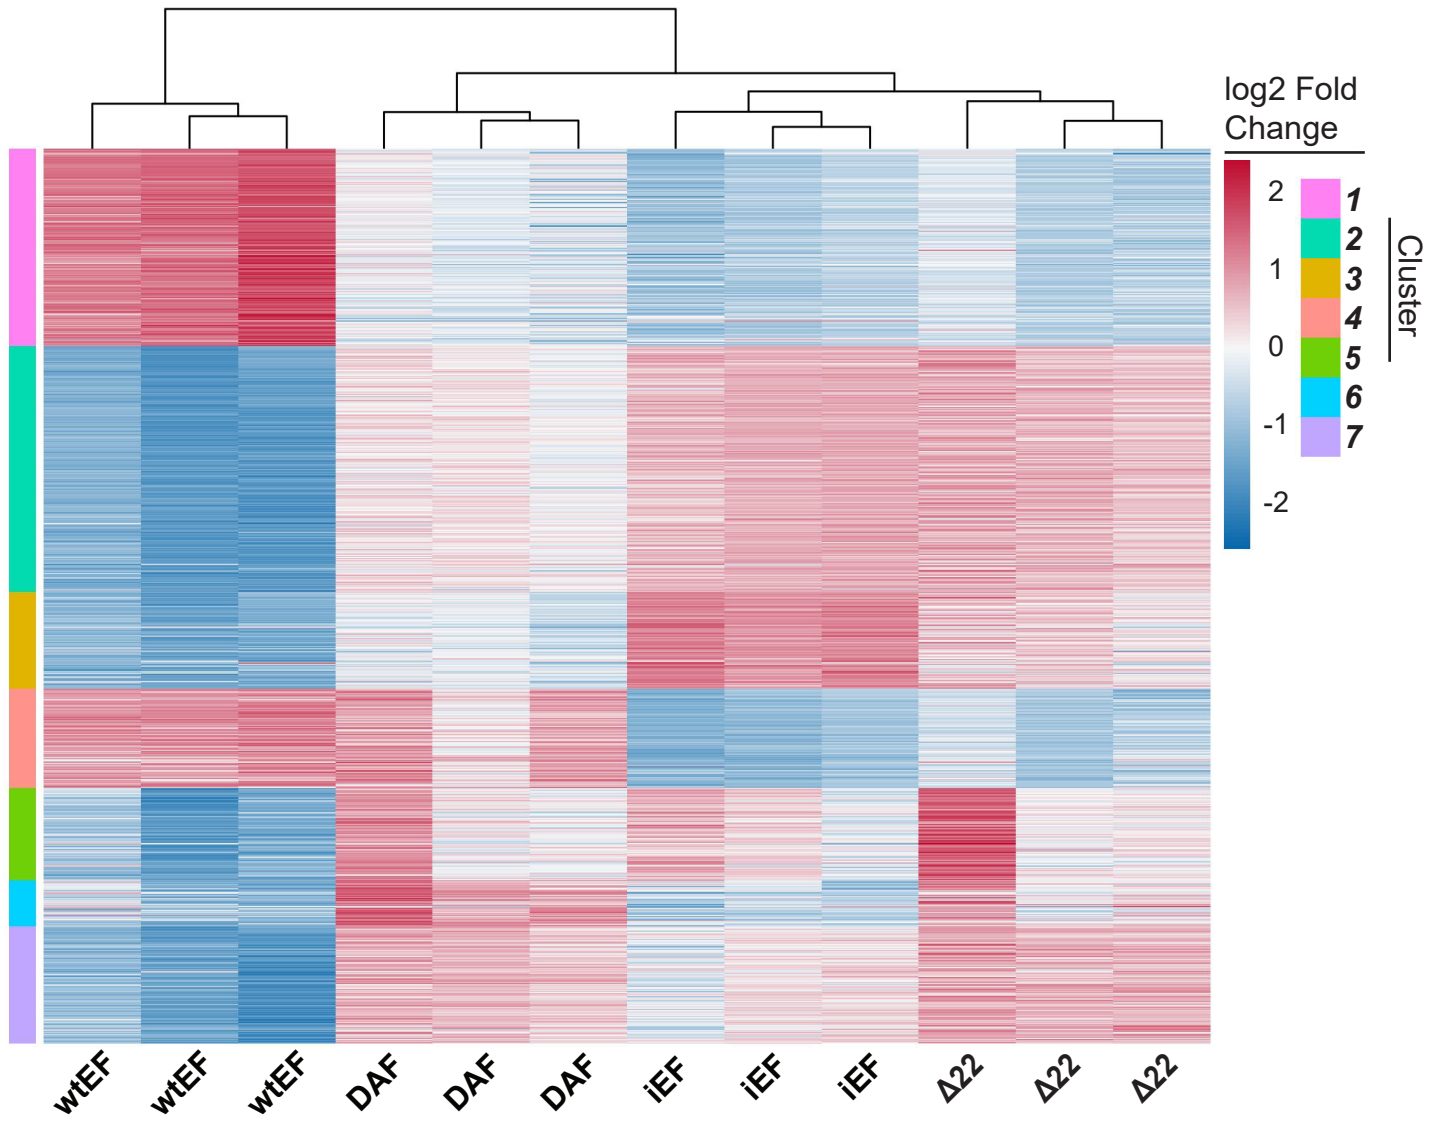

Supplement: NIHMS1623768-supplement-Supplementary_Figure_S5.pdf [file NIHMS1623768-supplement-Supplementary_Figure_S5.pdf]
